# Supplementary material for: Peroxisomal PEX7 Receptor Affects Cadmium-Induced ROS and Auxin Homeostasis in Arabidopsis Root System
Source: MDPI journal article supplement (doi:10.3390/antiox10091494), 2021-09-20
Supplement: s1 [file s1]

## Supplementary Materials

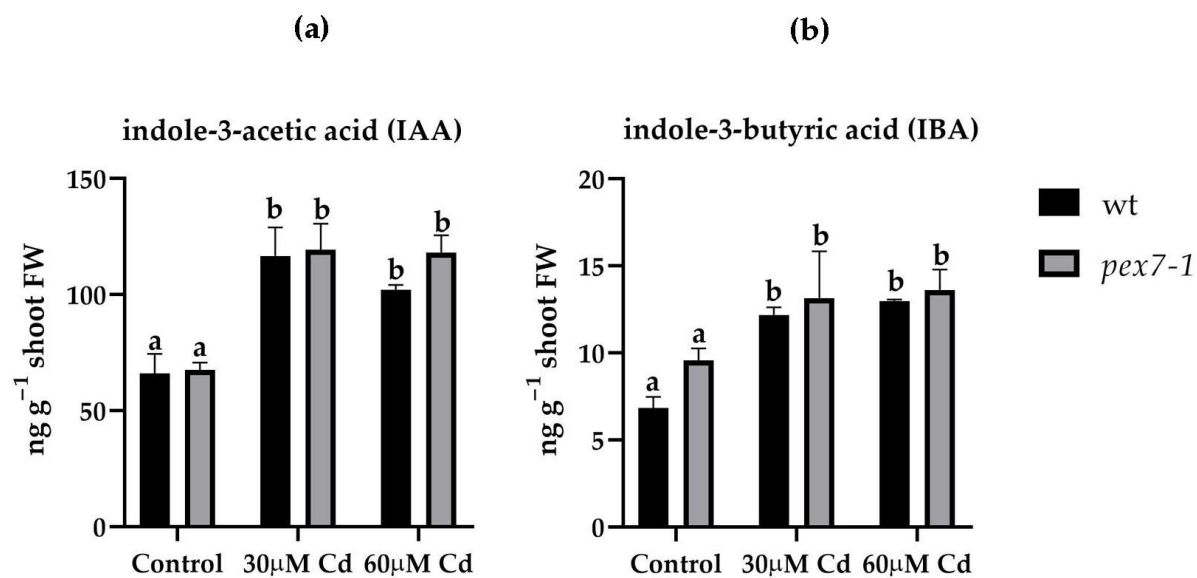

**Figure S1:** Mean values (±SE) from three technical replicates of IAA (a) and IBA (b) content (ng g<sup>-1</sup> FW) in shoots of wt and *pex7-1* seedlings not exposed (Control) or exposed to 30 μM CdSO<sub>4</sub> or 60 μM CdSO<sub>4</sub>. Columns labelled with different letters show statistical differences for at least  $p < 0.05$  among treatments within the same genotype and between genotypes within the same treatment. Columns labelled with the same letter, or no letter are not statistically different ( $p > 0.05$ ). Data from the first biological replicate are reported.

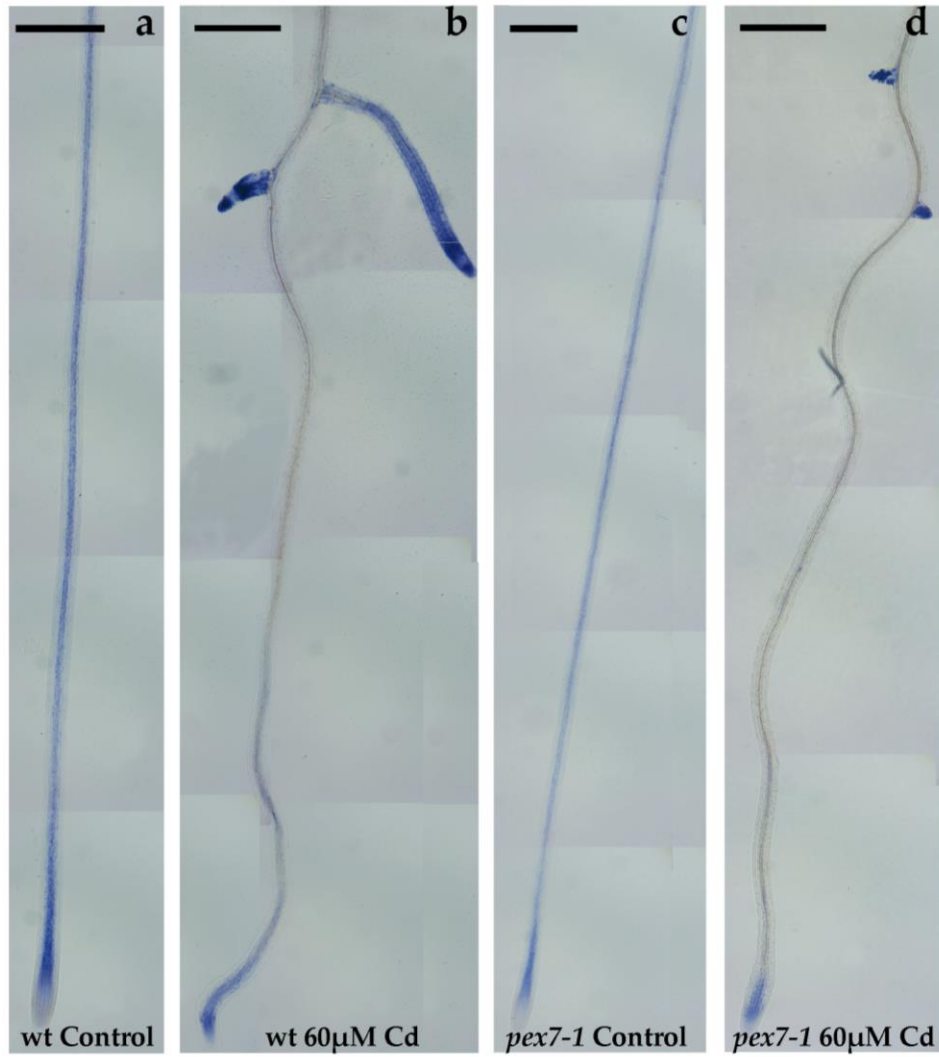

**Figure S2:** NBT histochemical analysis showing  $O_2^{\bullet-}$  staining in the primary and lateral roots of wt (a,b) and *pex7-1* (c,d) seedlings grown in the absence ((a,c), Control) or in the presence 60  $\mu$ M  $CdSO_4$  (60  $\mu$ M Cd) (b,d). Images were acquired with an Axio Imager M2 microscope and image tiles scanning were performed with an Axiocam 105 camera using Zen pro 2.5 software. Bars = 500  $\mu$ m.
